# Supplementary material
Source: publisher figshare collection journal article supplement (https://acs.figshare.com/ndownloader/files/3923170)
Supplement: Supplementary file 1 [file 3923170]

# SUPPORTING INFORMATION

## Full and Partial Emulsification of Crude Oil-Water Systems as a Function of Shear Intensity, Water Fraction and Temperature

*Jiangbo Wen, Jinjun Zhang\*, Zhihui Wang, Zongjie Zhang, Fei Zheng, Yimeng Zhu,*

*Shanpeng Han*

National Engineering Laboratory for Pipeline Safety/Beijing Key Laboratory of Urban Oil &  
Gas Distribution Technology, China University of Petroleum, Beijing 102249, China

---

\* Corresponding author. Tel: +86-10-8973-4627; Fax: 86-10-8973-4627.

E-mail address: [zhangjj@cup.edu.cn](mailto:zhangjj@cup.edu.cn)

### 1. The critical water fraction for full emulsification

For the eight studied crude oils, the critical water fractions of the systems for full emulsification are shown in Table S1.

**Table S1.** Critical water fractions of the systems for full emulsification.

| oil specimen | critical water fraction | standard deviation |
|--------------|-------------------------|--------------------|
| A            | 0.65                    | 0.012              |
| B            | 0.70                    | 0.010              |
| C            | 0.60                    | 0                  |
| D            | 0.62                    | 0.010              |
| E            | 0.55                    | 0.012              |
| F            | 0.65                    | 0.010              |
| G            | 0.57                    | 0.012              |
| H            | 0.60                    | 0.010              |

### 2. The range of shear rate for full emulsification

For the eight studied crude oils, the ranges of shear rate for full emulsification at 40 °C are shown in Table S2.

**Table S2.** The range of shear rate for full emulsification (40 °C)

| water fraction | range of shear rate (s <sup>-1</sup> ) |              |              |              |
|----------------|----------------------------------------|--------------|--------------|--------------|
|                | Oil A                                  | Oil B        | Oil C        | Oil D        |
| 0.30           | 63.0–(316.6)*                          | N/A          | N/A          | N/A          |
| 0.35           | 64.0–224.7                             | N/A          | N/A          | 66.3–(357.9) |
| 0.40           | 64.0–151.2                             | 68.0–(339.8) | 88.5–(386.7) | 69.4–291.9   |
| 0.45           | N/A                                    | 70.7–236.0   | 91.8–329.6   | N/A          |
| 0.50           | 65.1–133.4                             | 74.7–162.2   | 93.8–126.3   | 77.5–172.1   |
| 0.60           | 78.8–114.3                             | 86.8–127.2   | 100.7–119.7  | 92.6–154.1   |
| 0.62           | N/A                                    | N/A          | N/A          | 95.5–108.1   |
| 0.65           | 83.7–95.7                              | N/A          | N/A          | N/A          |
| 0.70           | N/A                                    | 92.7–103.2   | N/A          | N/A          |

\*The data in bracket is the highest attainable shear rate of that experiment.

**Table S2.** The range of shear rate for full emulsification (40 °C) (continued)

| water fraction | range of shear rate (s <sup>-1</sup> ) |              |              |              |
|----------------|----------------------------------------|--------------|--------------|--------------|
|                | Oil E                                  | Oil F        | Oil G        | Oil H        |
| 0.30           | N/A                                    | N/A          | 90.3–(378.9) | N/A          |
| 0.35           | 76.3–(408.2)*                          | N/A          | 96.2–318.3   | 85.6–(427.8) |
| 0.40           | 79.3–315.4                             | N/A          | 103.5–282.7  | 89.3–371.9   |
| 0.45           | N/A                                    | 76.3–(351.6) | N/A          | N/A          |
| 0.50           | 94.2–208.8                             | 82.6–277.1   | 110.4–163.4  | 97.7–239.1   |
| 0.55           | 99.4–172.4                             | N/A          | N/A          | N/A          |
| 0.57           | N/A                                    | N/A          | 114.3–123.4  | N/A          |
| 0.60           | N/A                                    | 97.8–184.9   | N/A          | 102.9–124.6  |
| 0.65           | N/A                                    | 104.2–158.4  | N/A          | N/A          |

\* The data in bracket is the highest attainable shear rate of that experiment.
